# Supplementary material
Source: PubMed Central journal article supplement (PMC7538767)
Supplement: sj-pdf-1-eso-10.1177_2396987320932065.pdf [file sj-pdf-1-eso-10.1177_2396987320932065.pdf]

## Supplementary content

M.G.H.E. den Brok, L.S. Kuhrij, B. Roozenbeek, A. van der Lugt, P.H.E. Hilken, D.W.J. Dippel, P.J. Nederkoorn. Prevalence and risk factors of symptomatic carotid stenosis in patients with recent TIA or ischemic stroke in the Netherlands.

**Supplement S1: Patients assessed with multiple vascular imaging modalities**

| Modality | Degree of stenosis | CTA  |        |        |      |
|----------|--------------------|------|--------|--------|------|
|          |                    | <50% | 50-69% | 70-99% | 100% |
| Duplex   | <50 %              | 15   | 0      | 2      | 0    |
|          | 50-69%             | 6    | 10     | 9      | 0    |
|          | 70-99%             | 0    | 3      | 22     | 0    |
|          | 100%               | 0    | 1      | 3      | 5    |

**Supplement S1a. Similarities and discrepancies in different degrees of ICA stenosis between duplex and CTA.** In 76 patients, both duplex and CTA were used to assess degree of ICA stenosis. Discrepancies were found in 31.6% (24/76 patients).

| Modality | Degree of stenosis | MRA  |        |        |      |
|----------|--------------------|------|--------|--------|------|
|          |                    | <50% | 50-69% | 70-99% | 100% |
| Duplex   | <50 %              | 4    | 0      | 0      | 0    |
|          | 50-69%             | 4    | 1      | 1      | 0    |
|          | 70-99%             | 2    | 0      | 6      | 2    |
|          | 100%               | 0    | 0      | 0      | 0    |

**Supplement S1b. Similarities and discrepancies in different degrees of ICA stenosis between duplex and MRA.** In 20 patients, both duplex and MRA were used to assess degree of ICA stenosis. Discrepancies were found in 45% (9/20 patients).

| Modality | Degree of stenosis | MRA  |        |        |      |
|----------|--------------------|------|--------|--------|------|
|          |                    | <50% | 50-69% | 70-99% | 100% |
| CTA      | <50 %              | 0    | 0      | 0      | 0    |
|          | 50-69%             | 0    | 0      | 0      | 0    |
|          | 70-99%             | 0    | 0      | 0      | 1    |
|          | 100%               | 0    | 0      | 0      | 0    |

**Supplement S1c. Similarities and discrepancies in different degrees of ICA stenosis between CTA and MRA.** Both CTA and MRA were used to assess degree of ICA stenosis in only one patient with discrepant conclusions.

|                                             | Degree of stenosis                    | Patients n/N (%; 95%CI)                                                                                                                        | Inclusion criteria                                                            | Exclusion criteria                                       | Mean age | Males          | Location                      |
|---------------------------------------------|---------------------------------------|------------------------------------------------------------------------------------------------------------------------------------------------|-------------------------------------------------------------------------------|----------------------------------------------------------|----------|----------------|-------------------------------|
| <b>Admani 1991</b> <sup>1</sup>             | 75-100%                               | 29/118 ( <b>24.6%; 17.3-33.5</b> )                                                                                                             | First ever stroke (not specified) in the carotid territory                    | Age <65 years                                            | 74.5     | 66/118 (55.9%) | Extracranial CCA and ICA      |
| <b>Fairhead 2005</b> <sup>2</sup><br>OPCT   | 50-69%<br>70-99%<br>50-99%<br>50-100% | 37/756 ( <b>4.9%; 3.5-6.7</b> )<br>54/756 ( <b>7.1%; 5.5-9.3</b> )<br>91/756 ( <b>12.0%; 9.9-14.6</b> )<br>120/756 ( <b>15.8%; 13.4-18.7</b> ) | Retinal or cerebral carotid territory TIA or infarct                          | -                                                        | -        | -              | -                             |
| <b>Fairhead 2005</b> <sup>2</sup><br>OXVASC | 50-100%                               | 38/228 ( <b>14.6%; 10.7-19.6</b> )                                                                                                             | Nondisabling (mRS ≤2) retinal or cerebral carotid territory TIA or infarction | -                                                        | -        | -              | -                             |
| <b>Ois 2009</b> <sup>3</sup>                | 50-99%                                | 163/1151 ( <b>14.2%; 12.2-16.3</b> )                                                                                                           | First ever nondisabling infarction (NIHSS <7) or TIA                          | Advanced age, comorbidity or concomitant cardiac disease | 71.8     | 97 (59.5%)     | Intracranial and extracranial |
| <b>den Brok 2020</b>                        | 50-69%<br>50-99%<br>70-99%<br>100%    | 39/883 ( <b>4.4%; 3.2-6.1</b> )<br>110/883 ( <b>12.5%; 10.4-14.9</b> )<br>71/883 ( <b>8.0%; 6.4-10.1</b> )<br>46/883 ( <b>5.2%; 3.9-6.9</b> )  | TIA or infarction in carotid territory, amaurosis fugax, retinal infarction   | Age <18 years                                            | 68.5     | 55.2%          | Extracranial ICA              |

Abbreviations: OPCT: Oxfordshire Primary Care Trusts; OXVASC: Oxford Vascular Study; mRS: modified Ranking Scale; NIHSS:

National Institutes of Health Stroke Scale; CCA: common carotid artery; ICA: internal carotid artery.

**Supplement S2: Comparison of the current study with previous studies on prevalence of ICA stenosis**

## References

1. Admani AK, Mangion DM, Naik DR. Extracranial carotid artery stenosis: prevalence and associated risk factors in elderly stroke patients. *Atherosclerosis*. 1991;86(1):31-37. doi:10.1016/0021-9150(91)90096-L
2. Fairhead JF, Mehta Z, Rothwell PM. Population-based study of delays in carotid imaging and surgery and the risk of recurrent stroke. *Neurology*. 2005;65(3):371-375. doi:10.1212/01.WNL.0000170368.82460.b4
3. Ois A, Cuadrado-Godia E, Rodríguez-Campello A, Jimenez-Conde J, Roquer J. High risk of early neurological recurrence in symptomatic carotid stenosis. *Stroke*. 2009;40(8):2727-2731. doi:10.1161/STROKEAHA.109.548032
